# Supplementary material for: Identifying Prognostic Features by Bottom-Up Approach and Correlating to Drug Repositioning
Source: PLoS One. 2015 Mar 4;10(3):e0118672. doi: 10.1371/journal.pone.0118672 (PMC4349868; doi:10.1371/journal.pone.0118672)
Supplement: S9 Table — 10 out of 11 genes in P125 and 10 out of 14 genes in PN12567 are potential drug targets. (XLSX) [file pone.0118672.s014.xlsx]

## Sheet: Sheet1
Table S9. Genes annotated as druggable targets in P125 and PN12567.
	Name	Symbol	Drug IDs
P125	Pyruvate kinase isozymes R/L	PKLR	DB00119; DB02726; DB04551
	Pyruvate kinase isozymes M1/M2	PKM2	DB00119; DB01733; DB02726; DB07628; DB07692; DB07697
	Malate dehydrogenase, mitochondrial	MDH2	DB00157; DB04272
	Succinate dehydrogenase [ubiquinone] iron-sulfur subunit, mitochondrial	SDHB	DB00139; DB04141; DB08689
	Insulin-like growth factor IB	IGF1	DB01890; DB02643
	Hypoxia-inducible factor 1 alpha	HIF1A	DB08687
	Peroxisome proliferator-activated receptor gamma	PPARG	DB00159; DB00197; DB00244; DB00328; DB00412; DB00731; DB00795; DB00912; DB00966; DB01014; DB01050; DB01067; DB01132; DB01252; DB01393; DB04270; DB04689; DB06908; DB06926; DB07053; DB07111; DB07172; DB07208; DB07209; DB07302; DB07509; DB07675; DB07723; DB07724; DB07842; DB07863; DB08121; DB08302; DB08402; DB08435; DB08560; DB08760; DB08915
	Epidermal growth factor receptor	EGFR	DB00002; DB00072; DB00281; DB00317; DB00530; DB01259; DB01269; DB03496; DB05294; DB07602; DB07662; DB08916
	Transcription factor AP-1	JUN	DB00570; DB01029; DB01169
	Heat shock protein HSP 90-alpha	HSP90AA1	DB00615; DB00716; DB02359; DB02424; DB02550; DB02754; DB02840; DB03080; DB03093; DB03137; DB03431; DB03504; DB03749; DB03809; DB03899; DB04054; DB04254; DB04505; DB04588; DB06956; DB06957; DB06958; DB06961; DB06964; DB06969; DB07100; DB07317; DB07319; DB07324; DB07325; DB07495; DB07502; DB07594; DB07601; DB07877; DB08194; DB08197; DB08436; DB08442; DB08443; DB08557; DB08786; DB08787; DB08788; DB0…
PN12567	Thymidylate synthase	TYMS	DB00293; DB00322; DB00432; DB00440; DB00441; DB00544; DB00642; DB00650; DB01101; DB01643; DB03541; DB03800; DB04530; DB06813; DB07577; DB08478; DB08479; DB08734
	Hypoxia-inducible factor 1 alpha	HIF1A	DB08687
	Ribosomal protein S6 kinase alpha-1	RPS6KA1	DB04751
	Ribosomal protein S6 kinase alpha-4	RPS6KA4	DB03247
	Focal adhesion kinase 1	PTK2	DB03431; DB07248; DB07460
	Cellular tumor antigen p53	TP53	DB08363
	Histone deacetylase 2	HDAC2	DB00227; DB00277; DB01223; DB01303; DB02546
	C-X-C chemokine receptor type 4	CXCR4	DB00452; DB06809
	Tyrosine-protein kinase Lyn	LYN	DB03023; DB06616; DB08901
	Vascular cell adhesion protein 1	VCAM1	DB01136
